# Supplementary material
Source: publisher figshare collection journal article supplement (https://acs.figshare.com/ndownloader/files/20468196)
Supplement: Supplementary file 1 [file 20468196]

## Sheet: Sheet
Lipids	Ionization mode	RT (min)	m/z observed	Mass error (∆ppm)	Molecular fomula	Major product ions
FA 16:1	[M-H]-	1.964	253.217	2.8	C16H30O2	235.2
FA 20:3	[M-H]-	2.42	305.248	2.9	C20H34O2	261.2
FA 20:4	[M-H]-	1.993	303.232	3	C20H32O2	259.2
FA 20:5	[M-H]-	1.574	301.217	2	C20H30O2	257.2
FA 22:3	[M-H]-	3.347	333.279	2.1	C22H38O2	289.2
FA 22:4	[M-H]-	2.756	331.264	2.41	C22H36O2	287.2
FA 22:5	[M-H]-	2.105	329.248	2.73	C22H34O2	285.2
FA 22:6	[M-H]-	1.784	327.232	2.14	C22H32O2	283.2
LysoPC 16:0	[M+CH3COO]-	1.327	554.346	1.6	C24H50NO7P	480.3/255.2
LysoPC 16:1	[M+H]+	1.043	494.325	2.02	C24H48NO7P	184.07/104.1/(Acyl chain was confirmed in negative mode; 253.2)
LysoPC 18:0	[M+CH3COO]-	1.889	582.377	0.86	C26H54NO7P	508.3/283.2
LysoPC 18:1	[M+CH3COO]-	1.312	580.361	1.7	C26H52NO7P	506.3/281.2
LysoPC 20:1	[M+H]+	1.98	550.387	0.73	C28H56NO7P	184.07/104.1
LysoPC 20:4	[M+H]+	1.058	544.34	0.92	C28H50NO7P	184.07/104.1/(Acyl chain was confirmed in negative mode; 303.2)
LysoPC O-16:0	[M+H]+	1.575	482.361	0.62	C24H52NO6P	184.07/104.1
LysoPC O-18:0	[M+H]+	2.297	510.392	0.39	C26H56NO6P	184.07/104.1
LysoPE 16:0	[M-H]-	1.388	452.277	2.2	C21H44NO7P	255.2
LysoPE 18:0	[M-H]-	1.999	480.309	1.67	C23H48NO7P	283.2
LysoPE 18:1	[M-H]-	1.387	478.293	1.46	C23H46NO7P	281.2
PC 14:0_16:0	[M+CH3COO]-	7.108	764.544	1.05	C38H76NO8P	690/255.2/227.2
PC 14:0_20:4	[M+CH3COO]-	5.643	812.544	1.11	C42H76NO8P	738.5/303.2
PC 16:0_16:0	[M+CH3COO]-	9.601	792.575	1.14	C40H80NO8P	718.5/255.2
PC 16:0_18:0	[M+CH3COO]-	12.839	820.606	1.22	C42H84NO8P	746.5/255.2
PC 16:0_18:2	[M+H]+	7.938	758.569	0.395	C42H80NO8P	184.07/(Acyl chains were confirmed in negative mode; 279.2/255.2)
PC 16:0_20:4	[M+CH3COO]-	7.581	840.575	1.31	C44H80NO8P	766.5/303.2/25.2
PC 18:0_20:4	[M+H]+	9.368	810.6	0.49	C46H84NO8P	184.07/(Acyl chains were confirmed in negative mode; 794.5/303.2/283.2)
PC 16:0_22:6	[M+H]+	7.04	806.569	0.87	C46H80NO8P	184.07/(Acyl chains were confirmed in negative mode; 790.5/327.2/255.2)
PC 16:1_20:4	[M+H]+	5.872	780.554	0.13	C44H78NO8P	184.07/(Acyl chains were confirmed in negative mode; 764.5/303.2)
PC 16:1_22:6	[M+H]+	5.474	804.553	0.75	C46H78NO8P	184.07/(Acyl chains were confirmed in negative mode; 788.5/327.2/253.2)
PC 18:0_18:1	[M+CH3COO]-	12.944	846.622	0.71	C44H86NO8P	772.6/283.2/281.2
PC 18:0_22:6	[M+H]+	9.518	834.6	0.84	C48H84NO8P	184.07/(Acyl chains were confirmed in negative mode; 818.5/327.2/283.2)
PC 18:1_18:2	[M+H]+	8.199	784.585	0.13	C44H82NO8P	184.07/(Acyl chains were confirmed in negative mode; 281.2/279.2)
PC 18:2_20:4	[M+H]+	6.267	806.569	0.74	C46H80NO8P	184.07/(Acyl chains were confirmed in negative mode; 790.5/303.2/279.2)
PC 20:4_20:4	[M+CH3COO]-	5.98	888.574	1.81	C48H80NO8P	184.07/(Acyl chains were confirmed in negative mode; 814.5/303.2)
PC 20:4_22:5	[M+H]+	6.066	856.585	0.7	C50H82NO8P	184.07/(Acyl chains were confirmed in negative mode; 840.5/303.2/329.2)
PC 20:4_22:6	[M+CH3COO]-	5.487	912.574	1.86	C50H80NO8P	838.5/327.2/303.2
PC 44:11	[M+H]+	5.632	880.583	1.82	C52H82NO8P	184.07
PC O-18:0_16:0	[M+H]+	13.382	748.621	0.53	C42H86NO7P	184.07/(Acyl chains were confirmed in negative mode; 255.2)
PE 16:0_18:0	[M-H]-	13.064	718.538	1.11	C39H78NO8P	283.2/255.2
PE 18:0_18:1	[M-H]-	13.169	744.554	0.81	C41H80NO8P	283.2/281.2
PE 18:0_20:1	[M-H]-	13.887	772.585	1.29	C43H84NO8P	309.2/281.2
PE 18:0_20:3	[M-H]-	13.019	768.554	0.91	C43H80NO8P	305.2
PE 18:0_20:4	[M-H]-	11.044	766.538	1.17	C43H78NO8P	303.2/283.2
PE 18:0_22:4	[M-H]-	13.004	794.57	0.5	C45H82NO8P	331.2/283.2
PE 18:1_22:0	[M-H]-	14.538	800.617	1.12	C45H88NO8P	339.2/281.2
PE 18:1_24:0	[M-H]-	15.084	828.648	1.33	C47H92NO8P	367.2/281.2
PE 18:1_24:1	[M-H]-	14.508	826.632	1.45	C47H90NO8P	365.2/281.2
PE 20:0_20:4	[M-H]-	13.25	794.569	1.26	C45H82NO8P	311.2/303.2
PE 20:4_24:0	[M-H]-	14.568	850.631	1.88	C49H90NO8P	303.2
PE O-18:0_22:4	[M-H]-	13.505	780.59	1.79	C45H84NO7P	466.2/331.2
PE P-16:0_22:6	[M-H]-	8.584	746.512	1.21	C43H74NO7P	436.2/327.2
PE P-18:0_16:0	[M-H]-	13.475	702.543	2.27	C39H78NO7P	464.2/255.2
PE P-18:0_18:1	[M-H]-	13.535	728.559	0.82	C41H80NO7P	464.2/281.2
PE P-18:0_20:4	[M-H]-	12.577	750.543	1.2	C43H78NO7P	464.2/303.2
PE P-18:0_22:4	[M-H]-	13.37	778.575	0.64	C45H82NO7P	464.2/331.2
PE P-18:0_22:5	[M+H]+	12.804	778.574	1.03	C45H80NO7P	Neutral loss of 141/(Acyl chains were confirmed in negative mode;464.2/329.2)
PE P-20:0_20:4	[M-H]-	13.58	778.575	0.9	C45H82NO7P	492.2/303.2
PG 20:4_22:6	[M-H]-	3.638	841.502	1.07	C48H75O10P	327.2/303.2
PG 22:6_22:6	[M-H]-	3.452	865.501	1.62	C50H75O10P	327.2
PI 16:0_20:4	[M-H]-	5.187	857.517	1.4	C45H79O13P	303.2/255.2/241.2
PI 17:0_20:4	[M-H]-	5.965	871.533	1.61	C46H81O13P	303.2/269.2/241.2
PI 18:0_20:4	[M-H]-	6.87	885.549	1.47	C47H83O13P	303.2/283.2/241.2
SM d34:0	[M+H]+	7.683	705.59	0.28	C39H81N2O6P	184.07
SM d34:2	[M+H]+	5.75	701.559	0.29	C39H77N2O6P	184.07
Cer d18:1_24:1	[M+H]+	14.596	648.629	0.31	C42H81NO3	264.28
HexCer d18:1_24:1	[M+H]+	13.854	810.681	0.5	C48H91NO8	264.28
DiHexCer d18:1_24:1	[M+Na]+	13.592	994.715	1.61	C54H101NO13	264.28
TriHexCer d18:1_16:0	[M+Na]+	6.573	1046.66	2	C52H97NO18	264.28
TriHexCer d18:1_24:1	[M+H]+	13.413	1134.78	2	C60H111NO18	264.28
DAG 18:1_20:1	[M+NH4]+	14.415	666.603	0.75	C41H76O5	339.3
DAG 16:0_18:1	[M+Na]+	13.697	617.511	0	C37H70O5	339.3/313.3
DAG 16:0_20:3	[M+NH4]+	13.278	636.556	0.31	C39H70O5	641.5/313.3
DAG 16:0_20:4	[M+H-H2O]+	5.175	599.504	0.33	C39H68O5	313.3
DAG 18:0_18:1	[M+Na]+	14.4	645.543	0.46	C39H74O5	341.3/339.3
DAG 18:1_18:1	[M+Na]+	13.764	643.527	0	C39H72O5	339.3
DAG 18:1_20:4	[M+NH4]+	12.97	660.556	0	C41H70O5	339.3
TAG 52:2	[M+NH4]+	17.283	876.8	1.6	C55H102O6	603.5/577.5
TAG 52:3	[M+NH4]+	16.983	874.785	1.1	C55H100O6	601.5/579.5/575.5
TAG 52:4	[M+NH4]+	16.863	872.769	1.4	C55H98O6	551.5
TAG 52:5	[M+NH4]+	16.496	870.753	1.5	C55H96O6	569.5
TAG 54:2	[M+NH4]+	17.619	904.831	1.66	C57H106O6	605/603
TAG 54:3	[M+NH4]+	17.313	902.815	2.33	C57H104O6	603.5
TAG 54:4	[M+NH4]+	17.058	900.8	1.78	C57H102O6	601.5
TAG 54:5	[M+NH4]+	16.878	898.785	1.1	C57H100O6	903.7/625.5/599.5/577.5
TAG 54:6	[M+NH4]+	16.541	896.769	1.12	C57H98O6	901.7/551.5
TAG 56:4	[M+NH4]+	17.454	928.831	1.72	C59H106O6	629.5
TAG 56:5	[M+NH4]+	17.148	926.815	2.1	C59H104O6	627.5
TAG 56:6	[M+NH4]+	16.998	924.801	0.65	C59H102O6	625.5/577.5
TAG 56:7	[M+NH4]+	16.721	922.785	1.3	C59H100O6	575.5
TAG 58:5	[M+NH4]+	17.469	954.847	1.78	C61H108O6	625.5
TAG 58:6	[M+NH4]+	17.163	952.83	2.5	C61H106O6	653.5
TAG 58:8	[M+NH4]+	16.736	948.799	2.845	C61H102O6	627.5
TAG 60:9	[M+NH4]+	16.736	974.815	2.4	C63H104O6	979.8/701.5
CE 18:1	[M+NH4]+	17.439	668.634	0.75	C45H78O2	369.3
CE 18:2	[M+NH4]+	17.058	666.618	0.6	C45H76O2	369.3
CE 22:4	[M+NH4]+	17.193	718.649	0.42	C49H80O2	369.3
CE 22:6	[M+NH4]+	16.631	714.618	0.7	C49H76O2	369.3
CoQ10(Oxidized)	[M+NH4]+	16.07	880.717	0.8	C59H32O2	885.7/197.1
CoQ10(Reduced)	[M+NH4]+	15.65	882.732	1.6	C59H34O2	887.7/197.1
